# Supplementary material
Source: PubMed Central journal article supplement (PMC2947404)
Supplement: supp_ddq313_ddq313supp.pdf [file supp_ddq313_ddq313supp.pdf]

## Supplemental figure legends

**Fig. S1. Cloned htt transfected porcine fetal fibroblast cells.** (A) mEM48 immunofluorescent staining of non-transfected (Control) and N208-105Q cells (6-15 cell line). (B) N208-160Q cell colonies (line-101 and line-37) were immunostained with mEM48. Hoechst staining was used to reveal the nuclei of transfected cells.

**Fig. S2.** Photos of newborn HD transgenic pigs (7-9, 7-1-1, 7-1-2, and 6-15).

**Fig. S3.** Photos of 7-1-1 pig at 45 h after birth showing the chorea phenotype.

**Fig. S4.** 1C2 western blotting analysis showing the expression of transgenic htt in the peripheral tissues of the HD pig (6-15), but not in wild type (WT). Arrowhead indicates the uncleaved transgenic protein, and arrow indicates N208-105Q.

**Fig. S5.** Hematoxylin staining of the heart, kidney, muscle, and liver of transgenic HD pig (6-15). Micrographs (63X) are presented. Scale bar: 10  $\mu\text{m}$ .

**Fig. S6.** Electron microscopy of the striatum of a wild type pig brain at low (A) and high (B) magnifications. Arrows indicate neurons and double arrows indicate glial cells. Scale bars: (A), 5  $\mu\text{m}$ ; (B) 2  $\mu\text{m}$ .

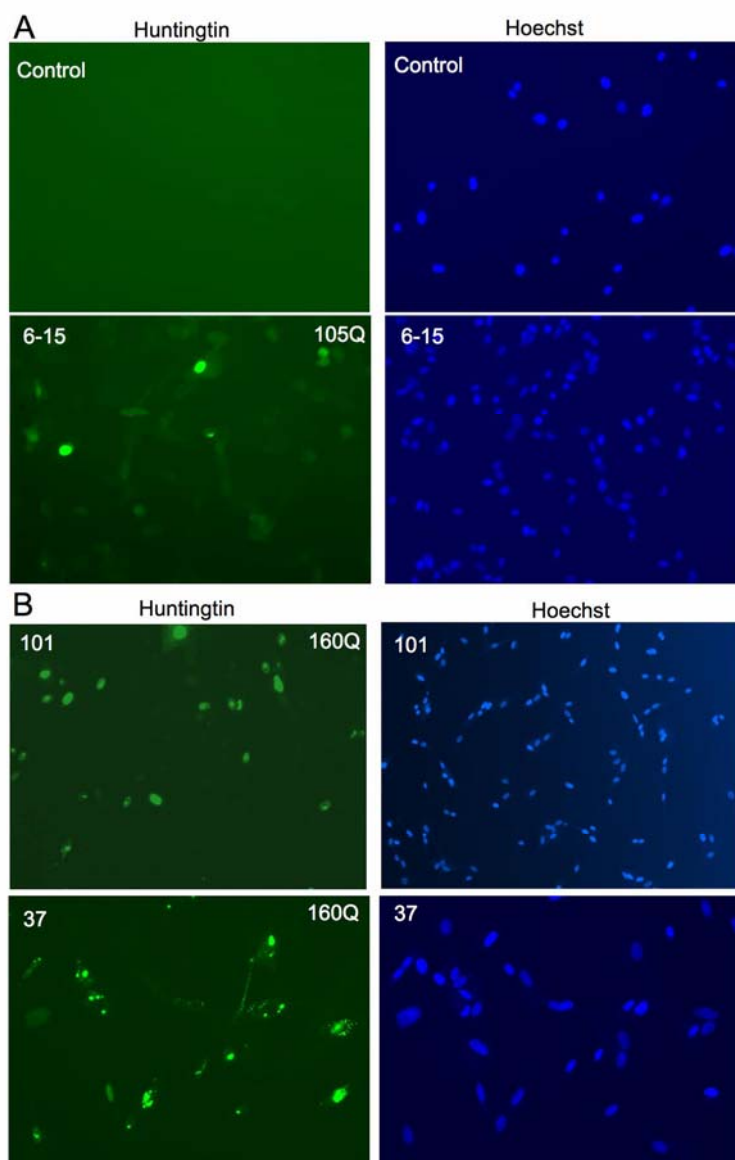

**Fig. S1.**

7-9

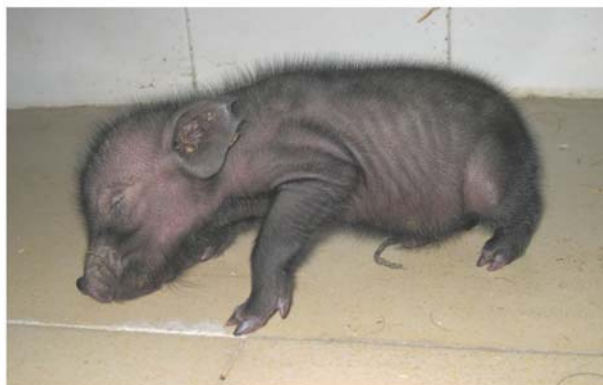

7-1-1

7-1-2

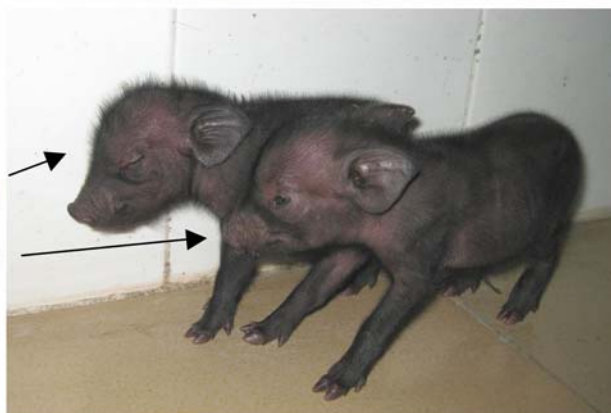

6-15

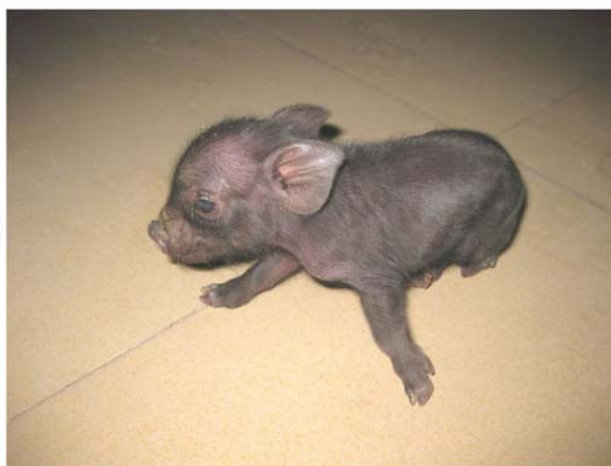

**Fig. S2.**

7-1-1

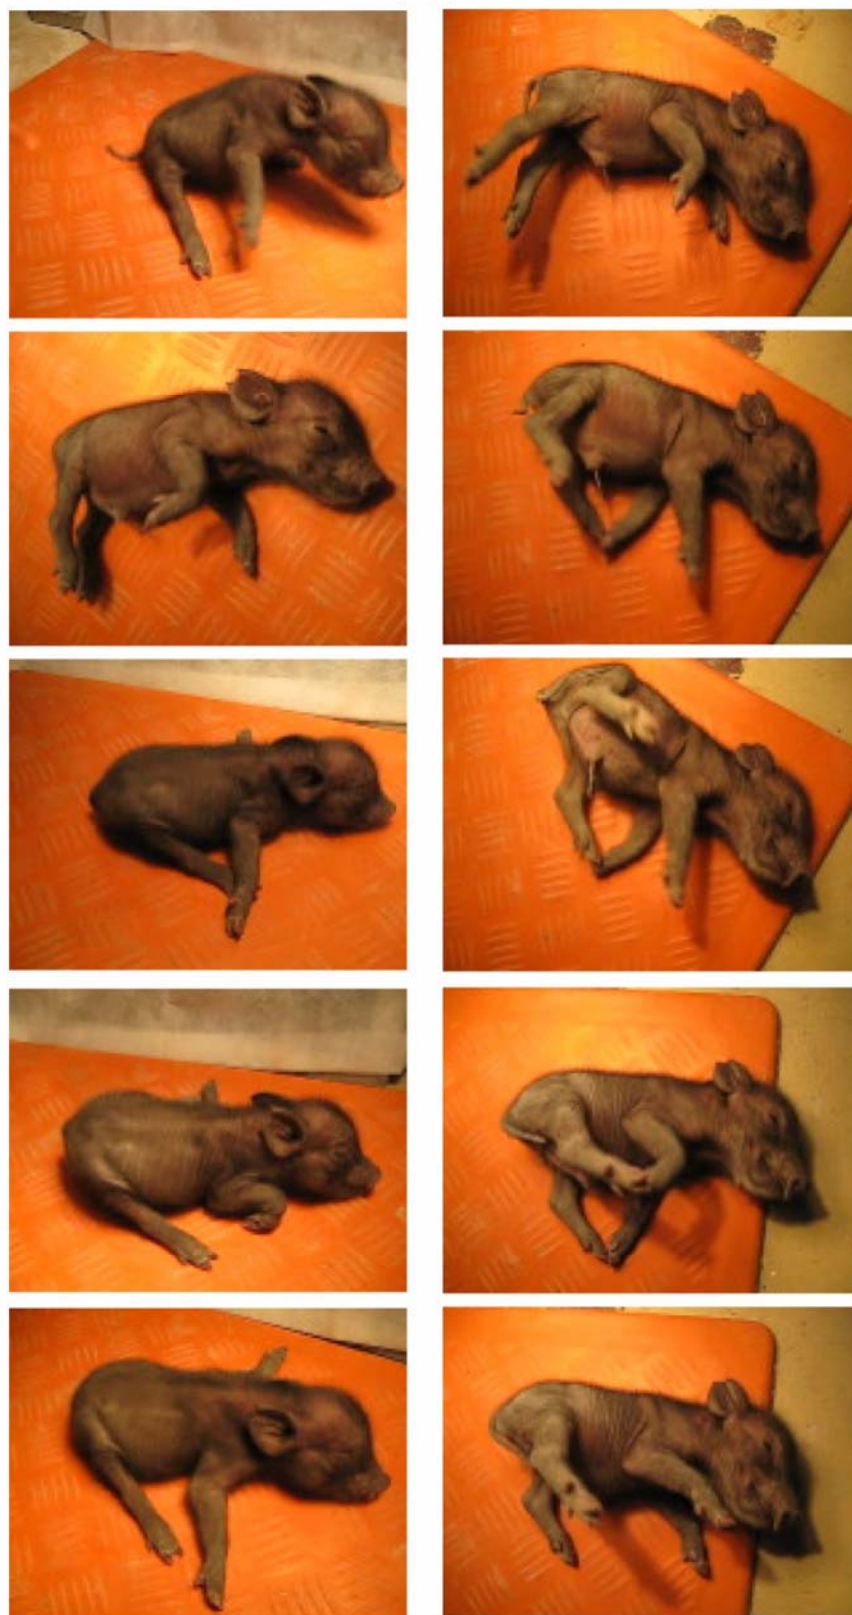

Fig. S3.

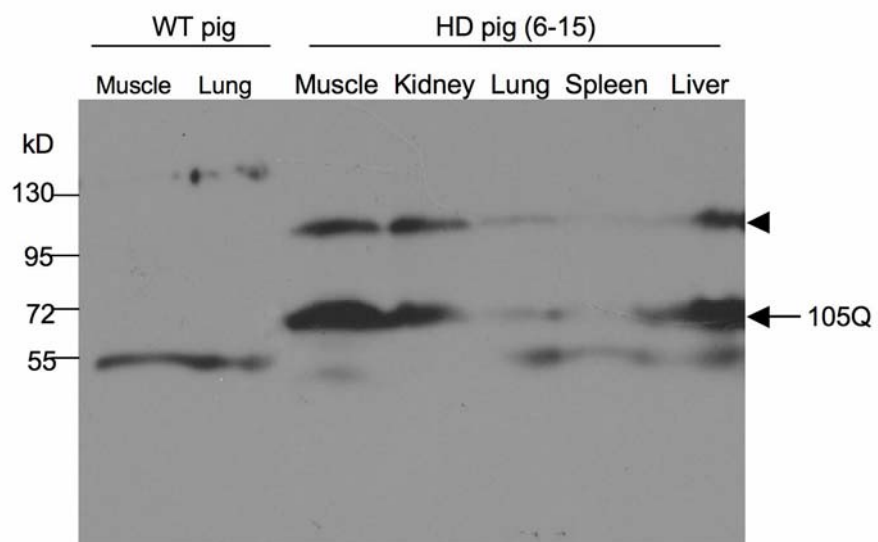

**Fig. S4.**

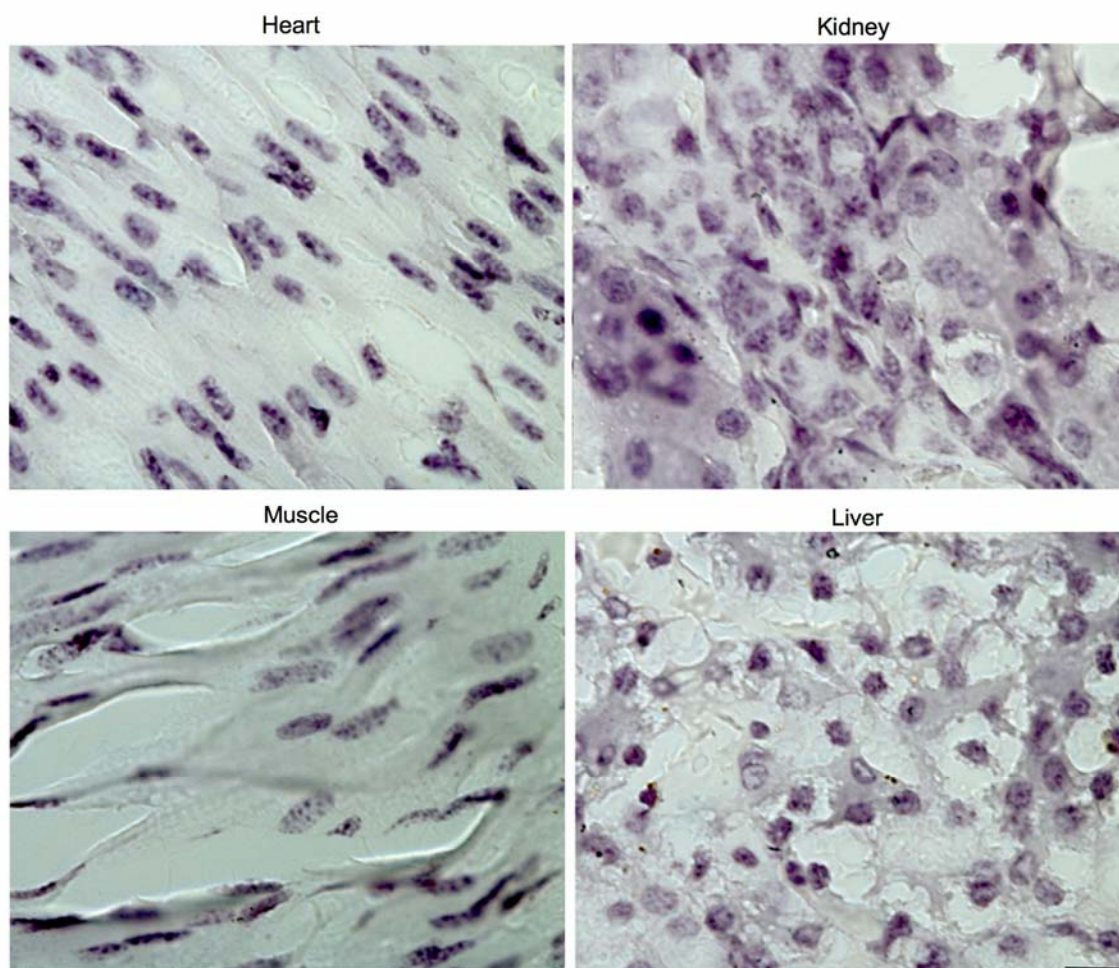

Fig. S5.

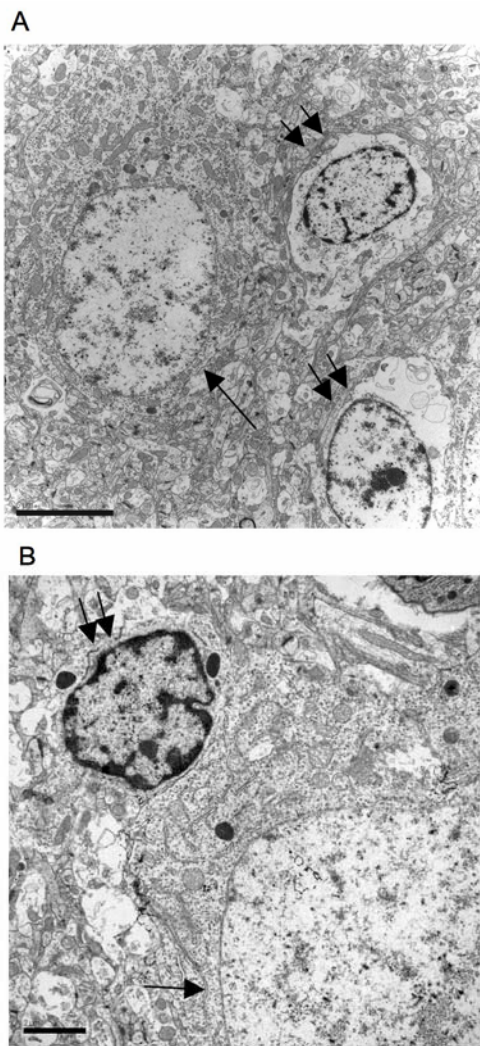

**Fig. S6.**
